# Supplementary material for: Randomised trial of a serious illness decision aid (Plan Well Guide) for patients and their substitute decision-makers to improve engagement in advance care planning
Source: HighWire-hosted journal article supplement (doi:10.1136/bmjspcare-2021-003040), 2021-06-30
Supplement: bmjspcare-2021-003040supp001_data_supplement.pdf [file bmjspcare-2021-003040supp001_data_supplement.pdf]

**Supplementary File 1:** Mean between-group differences and 95% confidence intervals for the change in trial outcomes by intention-to-treat and per-protocol, with and without imputation for missing data and with and without adjustment for study recruitment site.

| Outcome                                     | Immediate Intervention Group (mean, standard deviation) |           | Delayed Intervention Group (mean, standard deviation) |           | Mean Difference (95% confidence interval); P value |                                        |                                        |                                                      |                           |                                |
|---------------------------------------------|---------------------------------------------------------|-----------|-------------------------------------------------------|-----------|----------------------------------------------------|----------------------------------------|----------------------------------------|------------------------------------------------------|---------------------------|--------------------------------|
|                                             | Baseline                                                | Follow-up | Baseline                                              | Follow-up | ITT* (no imputation)                               | ITT (no imputation, adjusted for site) | ITT (with imputation for missing data) | ITT (with imputation missing data) adjusted for site | Per protocol              | Per protocol adjusted for site |
| SDM† ACP‡ Engagement Survey overall score   | 3.7, 8                                                  | 4.1, 0.6  | 3.6, 0.8                                              | 3.8, 0.8  | 0.3 (-0.1, 0.7)<br>p=0.12                          | 0.2 (-0.2, 0.6)<br>p=0.31              | 0.2 (-0.3, 0.6)<br>p=0.39              | 0.1 (-0.4, 0.6)<br>p=0.64                            | 0.2 (-0.2, 0.6)<br>p=0.28 | 0.1 (-0.3, 0.6)<br>p=0.60      |
| SDM knowledge sub-scale                     | 3.9, 0.7                                                | 4.4, 0.5  | 4.0, 1.0                                              | 4.3, 0.6  | 0.1 (-0.2, 0.4)<br>p=0.44                          | 0.0 (-0.3, 0.4)<br>p=0.82              | 0.1 (-0.2, 0.5)<br>p=0.40              | 0.1 (-0.3, 0.4)<br>p=0.37                            | 0.1 (-0.2, 0.4)<br>p=0.53 | 0.0 (-0.3, 0.4)<br>p=0.90      |
| SDM completion sub-scale                    | 4.0, 0.7                                                | 4.4, 0.4  | 4.2, 0.6                                              | 4.2, 0.5  | 0.2 (-0.1, 0.5)<br>p=0.22                          | 0.1 (-0.2, 0.5)<br>p=0.36              | 0.2 (-0.1, 0.4)<br>p=0.30              | 0.1 (-0.2, 0.4)<br>p=0.38                            | 0.1 (-0.2, 0.4)<br>p=0.36 | 0.1 (-0.2, 0.4)<br>p=0.59      |
| SDM self-efficacy sub-scale                 | 3.4, 1.2                                                | 3.6, 0.9  | 3.1, 1.4                                              | 3.2, 1.2  | 0.4 (-0.2, 1.0)<br>p=0.21                          | 0.3 (-0.4, 1.0)<br>p=0.39              | 0.3 (-0.4, .0.9)<br>p=0.40             | 0.2 (-0.5, 0.8)<br>p=0.62                            | 0.3 (-0.3, 1.0)<br>p=0.34 | 0.2 (-0.5, 0.9)<br>p=0.56      |
| SDM readiness sub-scale                     | 3.4, 1.1                                                | 3.9, 0.9  | 3.2, 1.1                                              | 3.4, 1.2  | 0.5 (-0.1, 1.1)<br>p=0.13                          | 0.3 (-0.3, 1.0)<br>p=0.34              | 0.4 (-0.3, 1.1)<br>p=0.22              | 0.3 (-0.3, 1.0)<br>p=0.32                            | 0.3 (-0.3, 0.9)<br>p=0.33 | 0.1 (-0.5, 0.8)<br>p=0.69      |
| SDM action sub-scale                        | 2.0, 1.8                                                | 3.0, 1.7  | 2.4, 1.6                                              | 2.6, 1.9  | 0.5 (-0.6, 1.6)<br>p=0.40                          | 0.3 (-0.9, 1.5)<br>p=0.58              | 0.2 (-0.9, 1.4)<br>p=0.68              | 0.1 (-1.0, 1.3)<br>p=0.84                            | 0.1 (-1.0, 1.2)<br>p=0.85 | -0.1 (-1.2, 1.1)<br>p=0.92     |
| Patient ACP Engagement Survey overall score | 3.9, 0.7                                                | 4.3, 0.6  | 3.7, 0.7                                              | 3.9, 0.7  | 0.5 (0.1, 0.9)<br>p=0.03                           | 0.4 (-0.1, 0.8)<br>p=0.09              | 0.4 (0.0, 0.8)<br>p=0.05               | 0.4 (-0.1, 0.8)<br>p=0.11                            | 0.4 (-0.0, 0.8)<br>p=0.05 | 0.3 (-0.1, 0.8)<br>p=0.13      |
| Patient self-efficacy sub-scale             | 4.6, 0.4                                                | 4.7, 0.4  | 4.6, 0.6                                              | 4.6, 0.7  | 0.1 (-0.2, 0.4)<br>p=0.40                          | 0.1 (-0.2, 0.5)<br>p=0.39              | 0.1 (-0.2, 0.4)<br>p=0.46              | 0.1 (-0.2, 0.4)<br>p=0.50                            | 0.1 (-0.2, 0.4)<br>p=0.48 | 0.1 (-0.2, 0.5)<br>p=0.50      |
| Patient readiness sub-scale                 | 3.1, 1.2                                                | 3.9, 1.0  | 2.8, 1.1                                              | 3.1, 1.2  | 0.8 (0.1, 1.4)<br>p=0.02                           | 0.6 (-0.1, 1.3)<br>p=0.09              | 0.7 (-0.0, 1.4)<br>p=0.06              | 0.6 (-0.2, 1.3)<br>p=0.12                            | 0.7 (0.0, 1.4)<br>p=0.04  | 0.5 (-0.2, 1.2)<br>p=0.13      |
| Patient action sub-scale                    | 2.1, 1.8                                                | 3.4, 2.0  | 1.5, 1.6                                              | 2.1, 1.9  | 1.2 (0.1, 2.4)<br>p=0.04                           | 1.0 (-0.3, 2.2)<br>p=0.13              | 0.9 (-0.4, 2.2)<br>p=0.19              | 0.8 (-0.6, 2.1)<br>p=0.25                            | 1.1 (-0.1, 2.3)<br>p=0.08 | 0.9 (-0.4, 2.2)<br>p=0.18      |

\* Intention-to-treat † Substitute decision-maker ‡ Advance care planning § Mean Difference
